# Supplementary material for: In vitro CRISPR screening uncovers CRTC3 as a regulator of IFN-γ-induced ferroptosis of hepatocellular carcinoma
Source: PubMed Central journal article supplement (PMC10477178; doi:10.1038/s41420-023-01630-8), 2023-09-04
Supplement: 41420_2023_1630_MOESM1_ESM.pdf [file 41420_2023_1630_MOESM1_ESM.pdf]

# ***In vitro* CRISPR screening uncovers CRTC3 as a regulator of IFN- $\gamma$ -induced ferroptosis of hepatocellular carcinoma**

Li Li<sup>1,2,3,4,\*</sup>, Tao Xing<sup>5,\*</sup>, Yiran Chen<sup>6,\*</sup>, Weiran Xu<sup>7,\*</sup>, Bo Fan<sup>8</sup>, Gaoda Ju<sup>5</sup>, Jing Zhao<sup>9</sup>, Li Lin<sup>4</sup>, Cihui Yan<sup>1,2,3,#</sup>, Jun Liang<sup>4,#</sup>, Xiubao Ren<sup>1,2,3,#</sup>

## **Supplementary material and methods**

### **Quantitative PCR**

Total RNA was isolated with Trizol reagent (Invitrogen, Thermo Fisher Scientific). cDNA synthesis was performed with 1 $\mu$ g of total RNA using the manufacturer's protocol. Quantitative PCR (qPCR) was performed on cDNA containing TB green reagent (RR820A; TaKaRa, Tokyo, JAPAN) and specific primers on a Real-time PCR machine (qTOWER3G, Analytik Jena, Jena, Germany) (n=3). All results were normalized to  $\beta$ -actin mRNA levels. Gene expression levels were measured using the  $\Delta\Delta$ Ct method. Sequences of primers are as follows:

ACSL5 forward: TCCTGACGTTTGG AACGGC

ACSL5 reverse: CTCCCTCAATCCCCACAGAC

$\beta$ -actin forward: GAGAAAATCTGGCACCACACC

$\beta$ -actin reverse: GGATAGCACAGCCTGGATAGCAA

## Supplementary figures

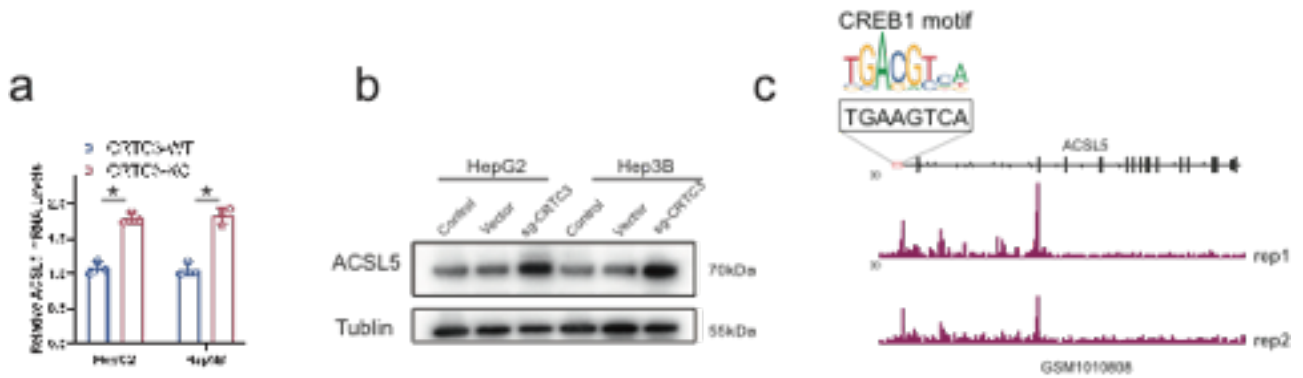

**Fig. S1: Bioinformatics and ChIP-seq analysis revealed ACSL5 as a direct target of CREB1.**

**a.** qPCR analysis showed enhanced ACSL5 expression in mRNA levels following CRTC3 knockout in both Hep3B and HepG2 cell lines (n=3). **b.** Western blotting revealed enhanced ACSL5 expression in protein levels (replicated for 3 times). **c.** Bioinformatics analysis using <https://jaspar.genereg.net/> and ChIP-seq analysis using data from GSM1010808 found a binding motif of CREB1 in the transcriptional regulatory regions of ACSL5.
