# Supplementary material for: In vitro CRISPR screening uncovers CRTC3 as a regulator of IFN-γ-induced ferroptosis of hepatocellular carcinoma
Source: PubMed Central journal article supplement (PMC10477178; doi:10.1038/s41420-023-01630-8), 2023-09-04

# Unedited blot and gel images

Figure 2c Rep1

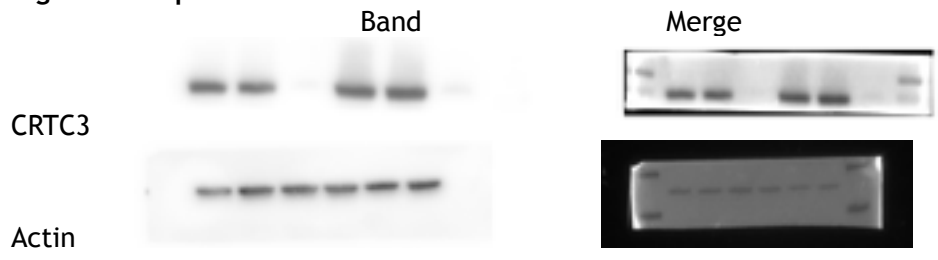

Figure 2c Rep2

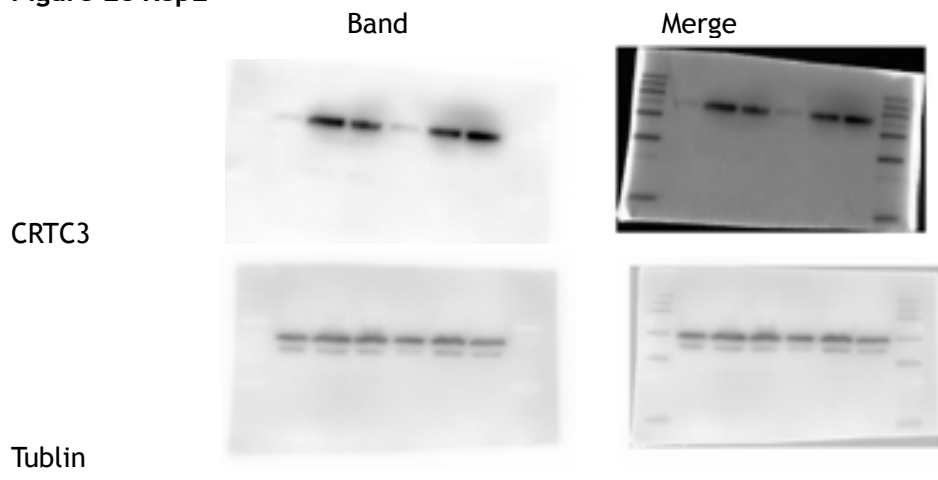

Figure 2c Rep3

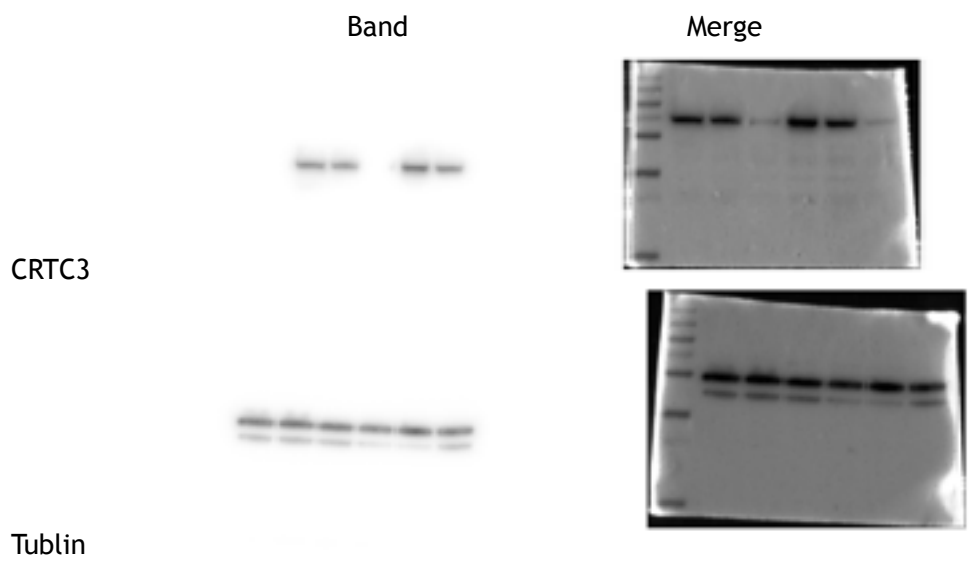

Figure 4b Rep1

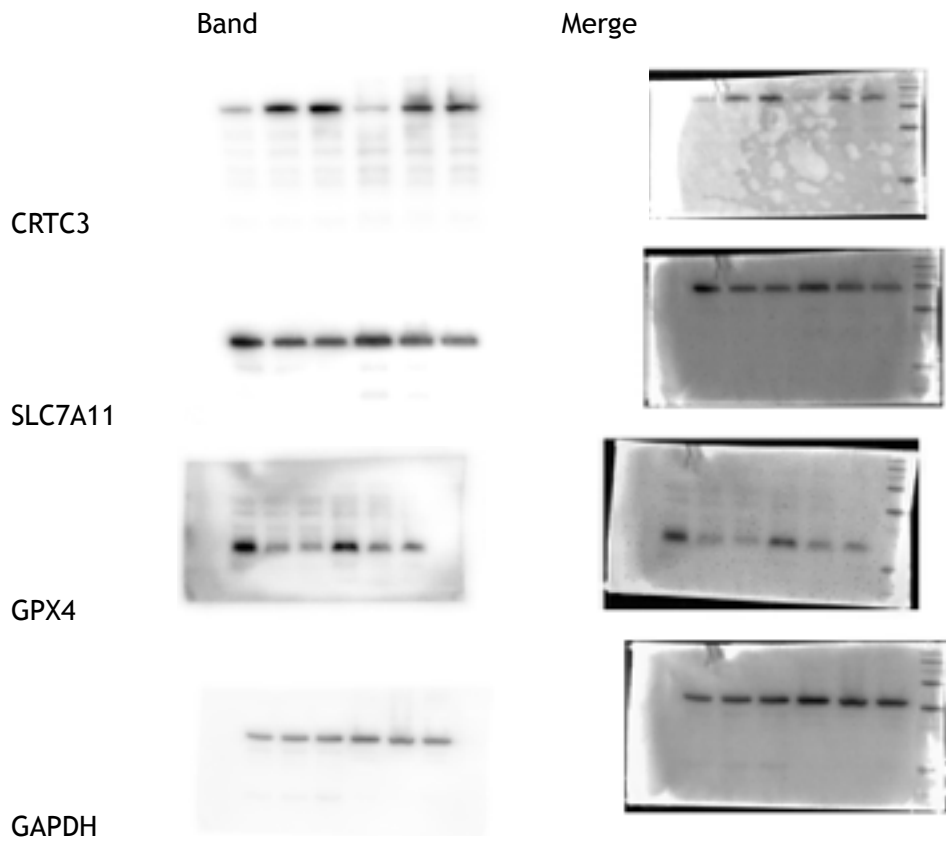

Figure 4b Rep2

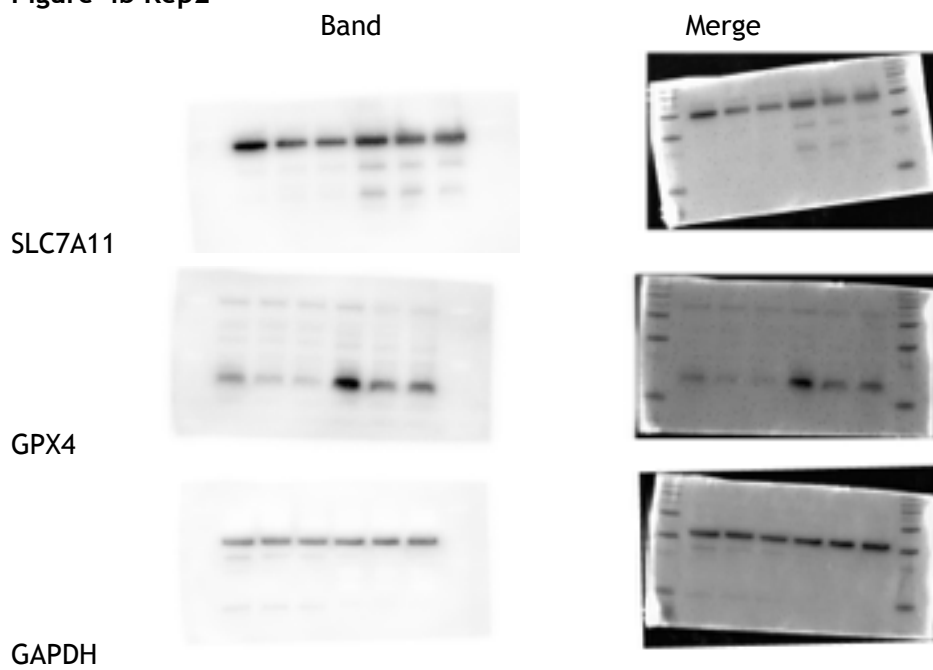

Figure 4b Rep3

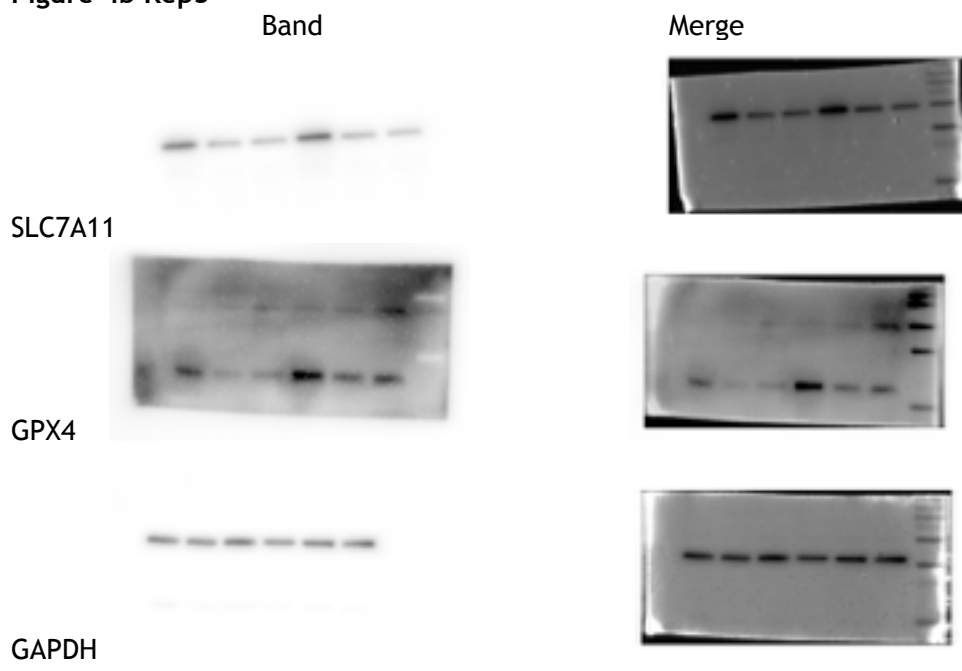

**Figure S1b Rep1**

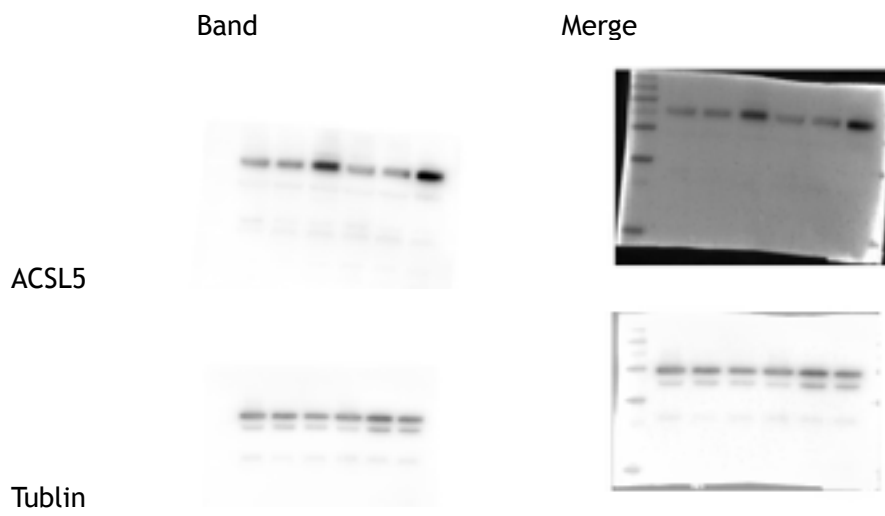

**Figure S1b Rep2**

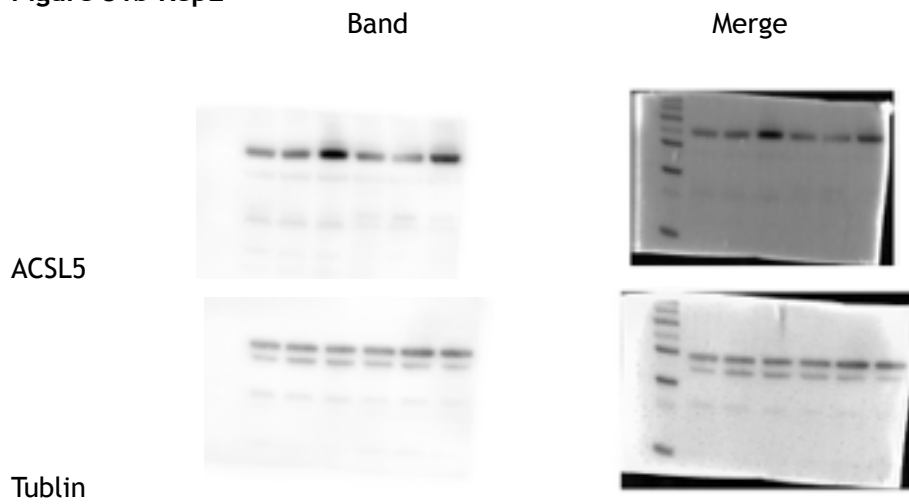

**Figure S1b Rep3**

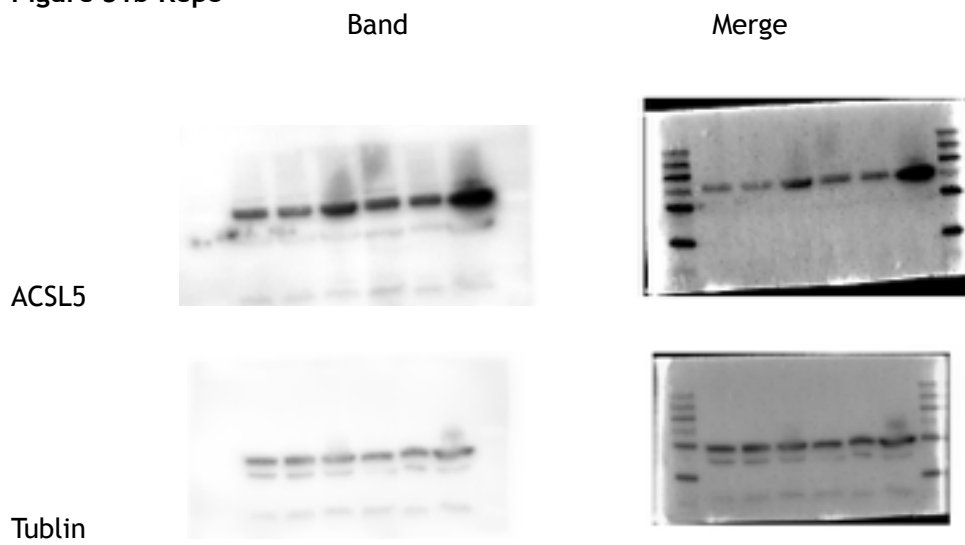

Supplement: 41420_2023_1630_MOESM2_ESM.pdf [file 41420_2023_1630_MOESM2_ESM.pdf]
